# Supplementary material for: Another choice for measuring tree photosynthesis in vitro
Source: PeerJ. 2019 Jan 8;7:e5933. doi: 10.7717/peerj.5933 (PMC6329340; doi:10.7717/peerj.5933)
Supplement: Data S1 [file peerj-07-5933-s001.xls]

## Sheet: Sheet1
		In Situ	SE	Mincing	SE	Immersing in SA	SE
Tr	CY	0.81886	0.05032	1.1084	0.06535	1.0328	0.0233
	MD	0.45023	0.04365	0.66445	0.00518	0.81153	0.05164
	HS	1.0848	0.06577	1.2353	0.17076	0.93309	0.01989
	PT	1.5298	0.25428	2.1228	0.24307	1.7096	0.3079
	AE	0.96354	0.1738	1.3379	0.22662	1.7035	0.25493
	KP	1.6839	0.27035	1.8087	0.29396	1.6894	0.24077
	DK	3.1979	0.16594	1.7912	0.40277	2.3299	0.33258
	AC	1.8812	0.29298	0.99247	0.093	1.2336	0.40647
	EJ	1.94	0.17522	1.7773	0.33089	2.0011	0.45315
	LL	0.97101	0.05371	1.4321	0.06535	1.8711	0.0233
		In Situ	SE	Mincing	SE	Immersing in SA	SE
gs	CY	0.07812	0.00647	0.09688	0.00289	0.12624	0.01126
	MD	0.02847	0.00349	0.061	0.01704	0.03759	0.00712
	HS	0.08952	0.01971	0.09716	0.01425	0.20477	0.01747
	PT	0.26468	0.02719	0.26924	0.01307	0.19469	0.04134
	AE	0.1058	0.01388	0.10638	0.01803	0.10774	0.02413
	KP	0.17796	0.03306	0.19681	0.04012	0.12186	0.00403
	DK	0.31497	0.02775	0.15579	0.02887	0.18045	0.02195
	AC	0.1181	0.02827	0.06017	0.0039	0.10066	0.00664
	EJ	0.30446	0.06346	0.10002	0.01438	0.22801	0.0397
	LL	0.07084	0.0077	0.10187	0.00578	0.11562	0.01362
		In Situ	SE	Mincing	SE	Immersing in SA	SE
Ci	CY	202.71	9.68766	248.88	1.62231	286.94	5.96963
	MD	223.03	6.72594	305.54	34.8594	225.7	37.5556
	HS	192.51	34.3514	229.43	14.4449	327.96	12.863
	PT	295.65	12.3607	282.1	8.12309	278.78	19.179
	AE	254.3	8.87362	253.4	28.8205	245.88	23.3127
	KP	269.48	23.9651	280.34	4.79764	261.19	8.85053
	DK	301.35	10.8135	278.43	4.89579	266.34	8.12886
	AC	282.08	30.9278	262.47	19.8314	286.17	2.9444
	EJ	296.04	20.6685	254.21	8.21546	281.34	14.1447
	LL	186.63	14.7105	209.78	7.52843	216.05	5.3923
